# Supplementary material for: Missense mutations in small muscle protein X-linked (SMPX) cause distal myopathy with protein inclusions
Source: PubMed Central journal article supplement (PMC8270885; doi:10.1007/s00401-021-02319-x), 2021-05-11
Supplement: 401_2021_2319_MOESM1_ESM.pdf [file 401_2021_2319_MOESM1_ESM.pdf]

**Supplementary Figure 1: Localization of SMPX constructs in cultured cells**

(a) SMPX-V5 in HeLa cells (single confocal sections)

(b) Myc-SMPX in C2C12 myoblasts (single confocal sections)

(c) SMPX-V5 in C2C12 myotubes (maximum intensity projections)

(d) Myc-SMPX in C2C12 myotubes (maximum intensity projections)

The image intensity levels have been individually adjusted and are not comparable between images. Scale bars = 20  $\mu$ m

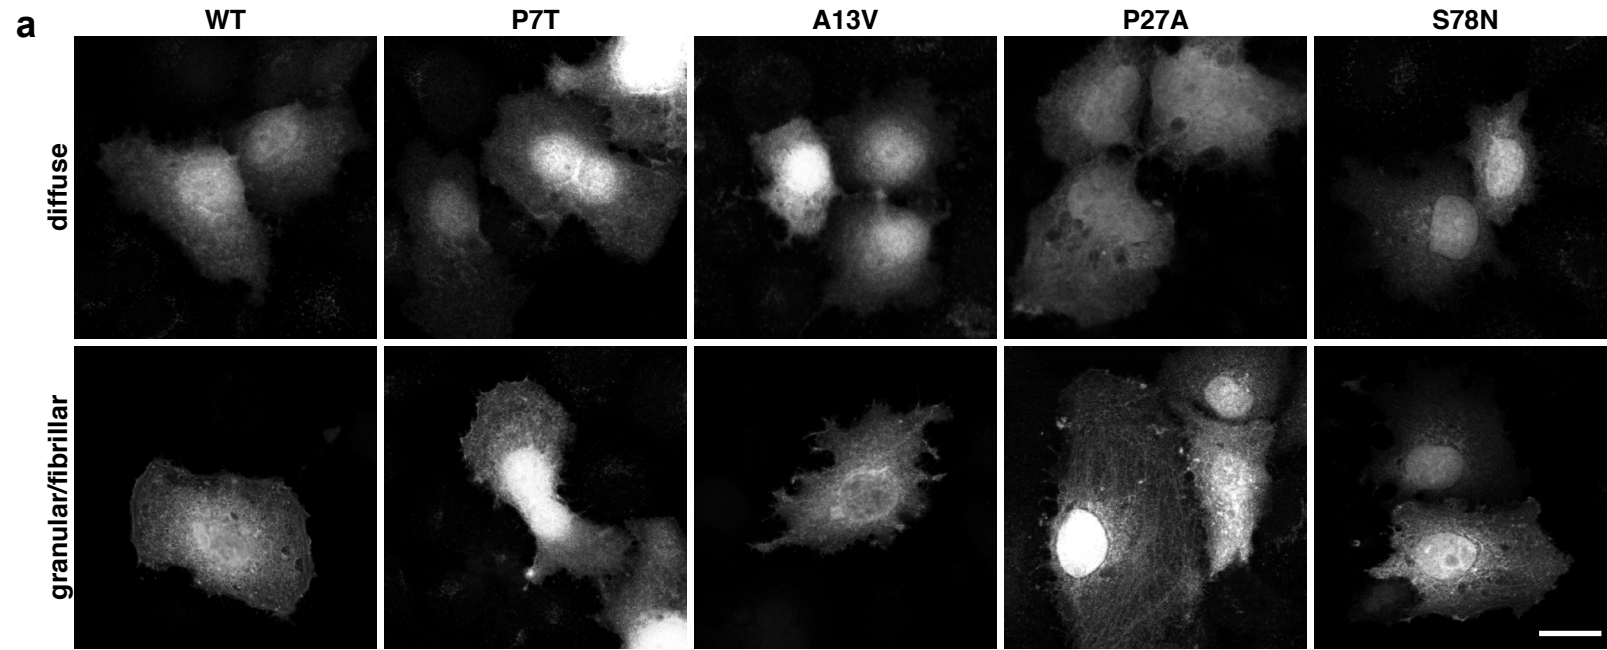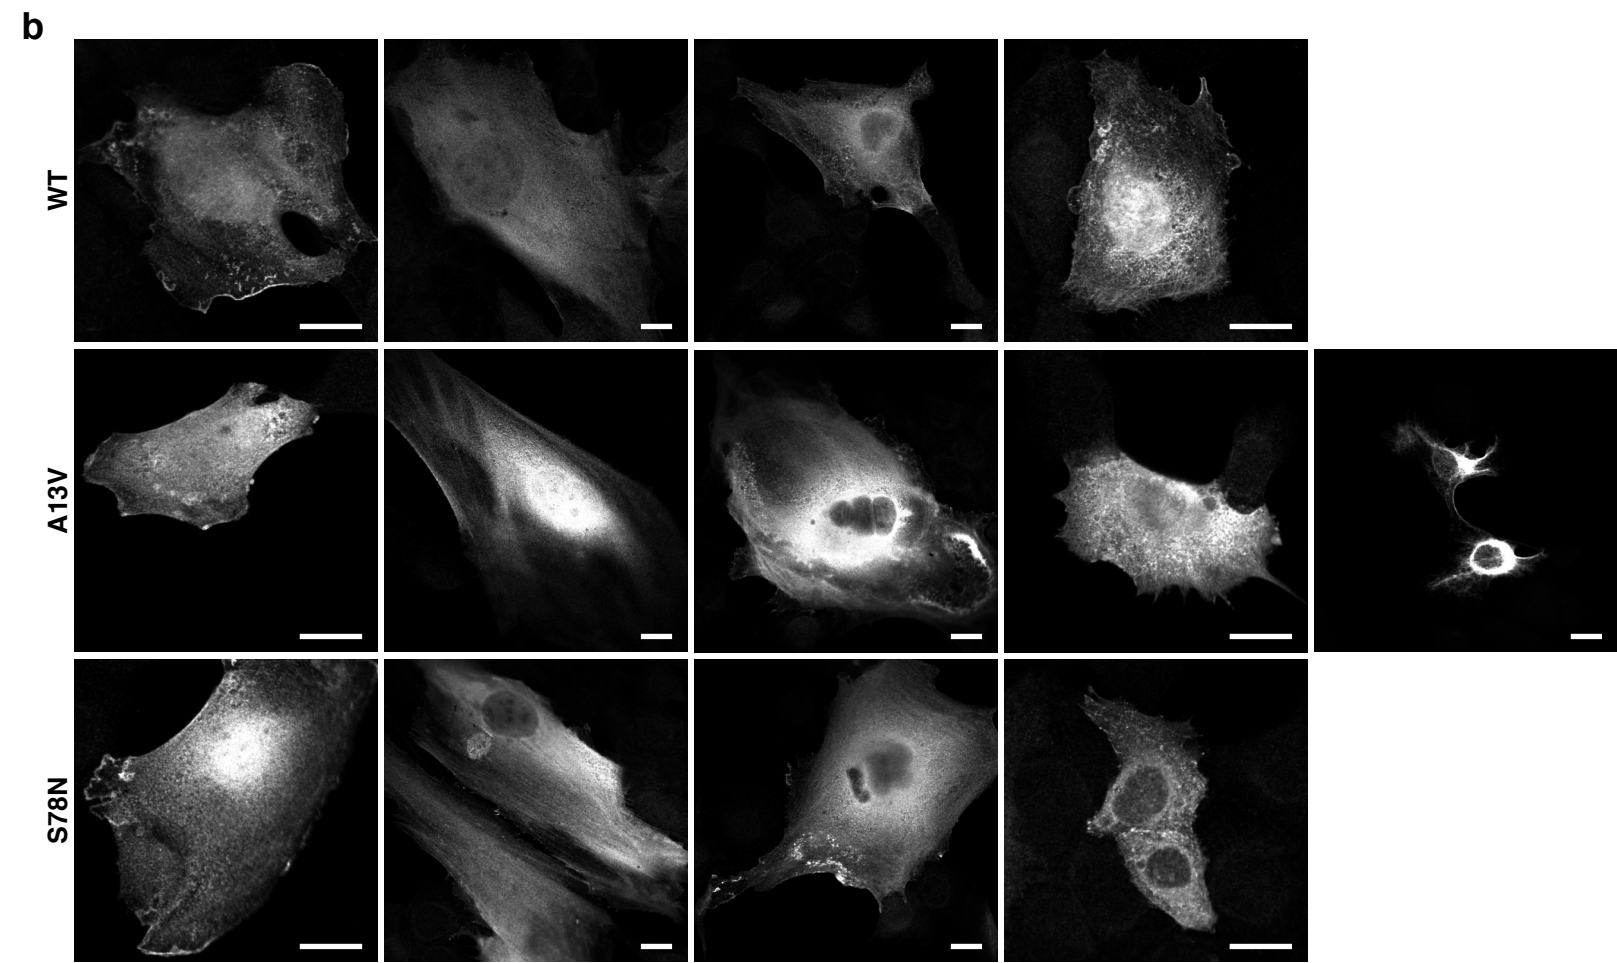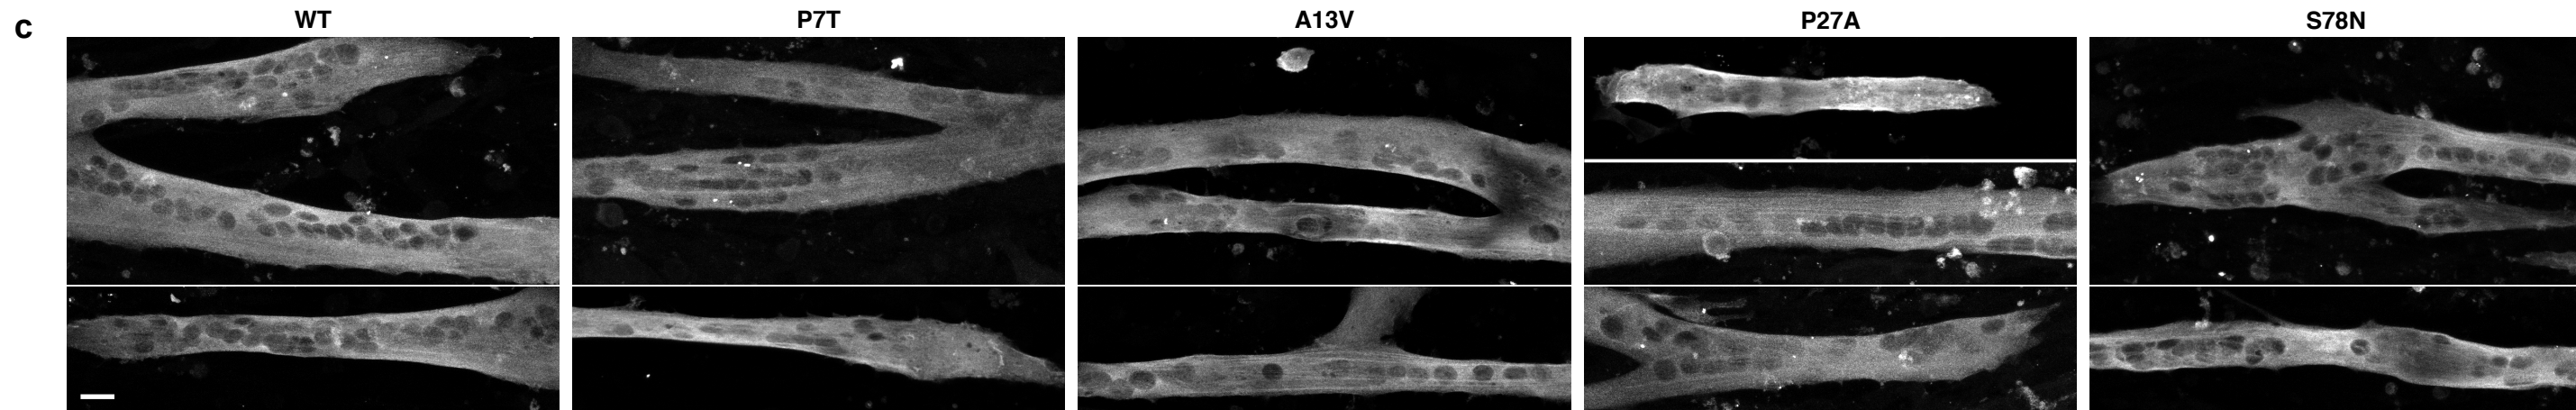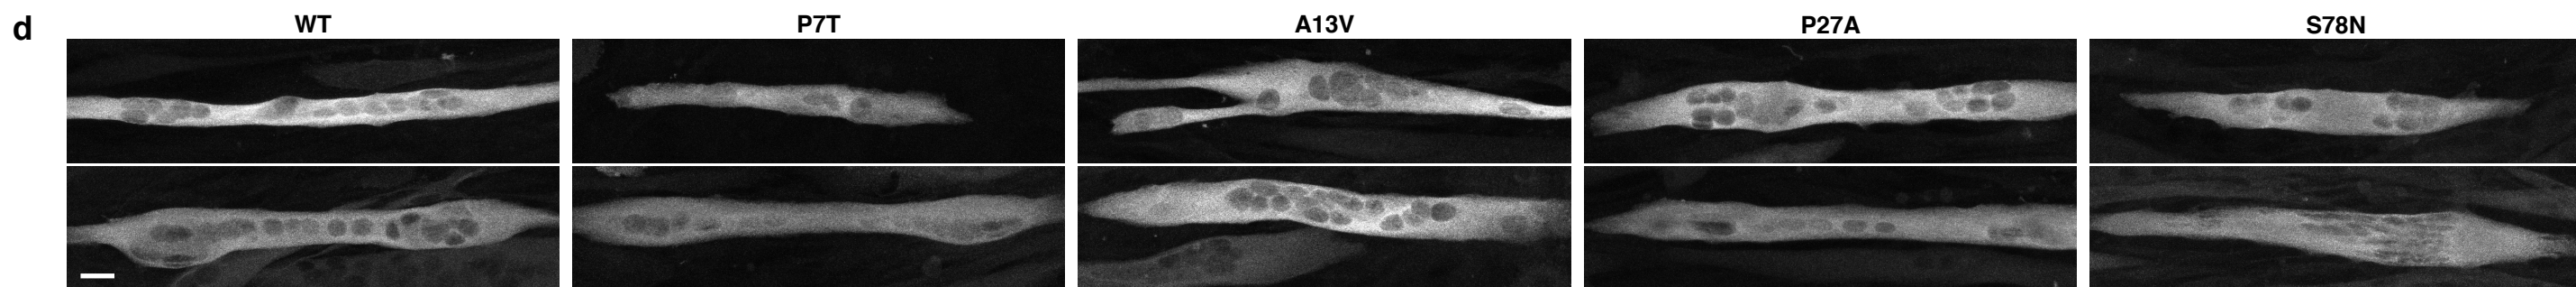

**Supplementary Figure 2: SMPX and stress granules**

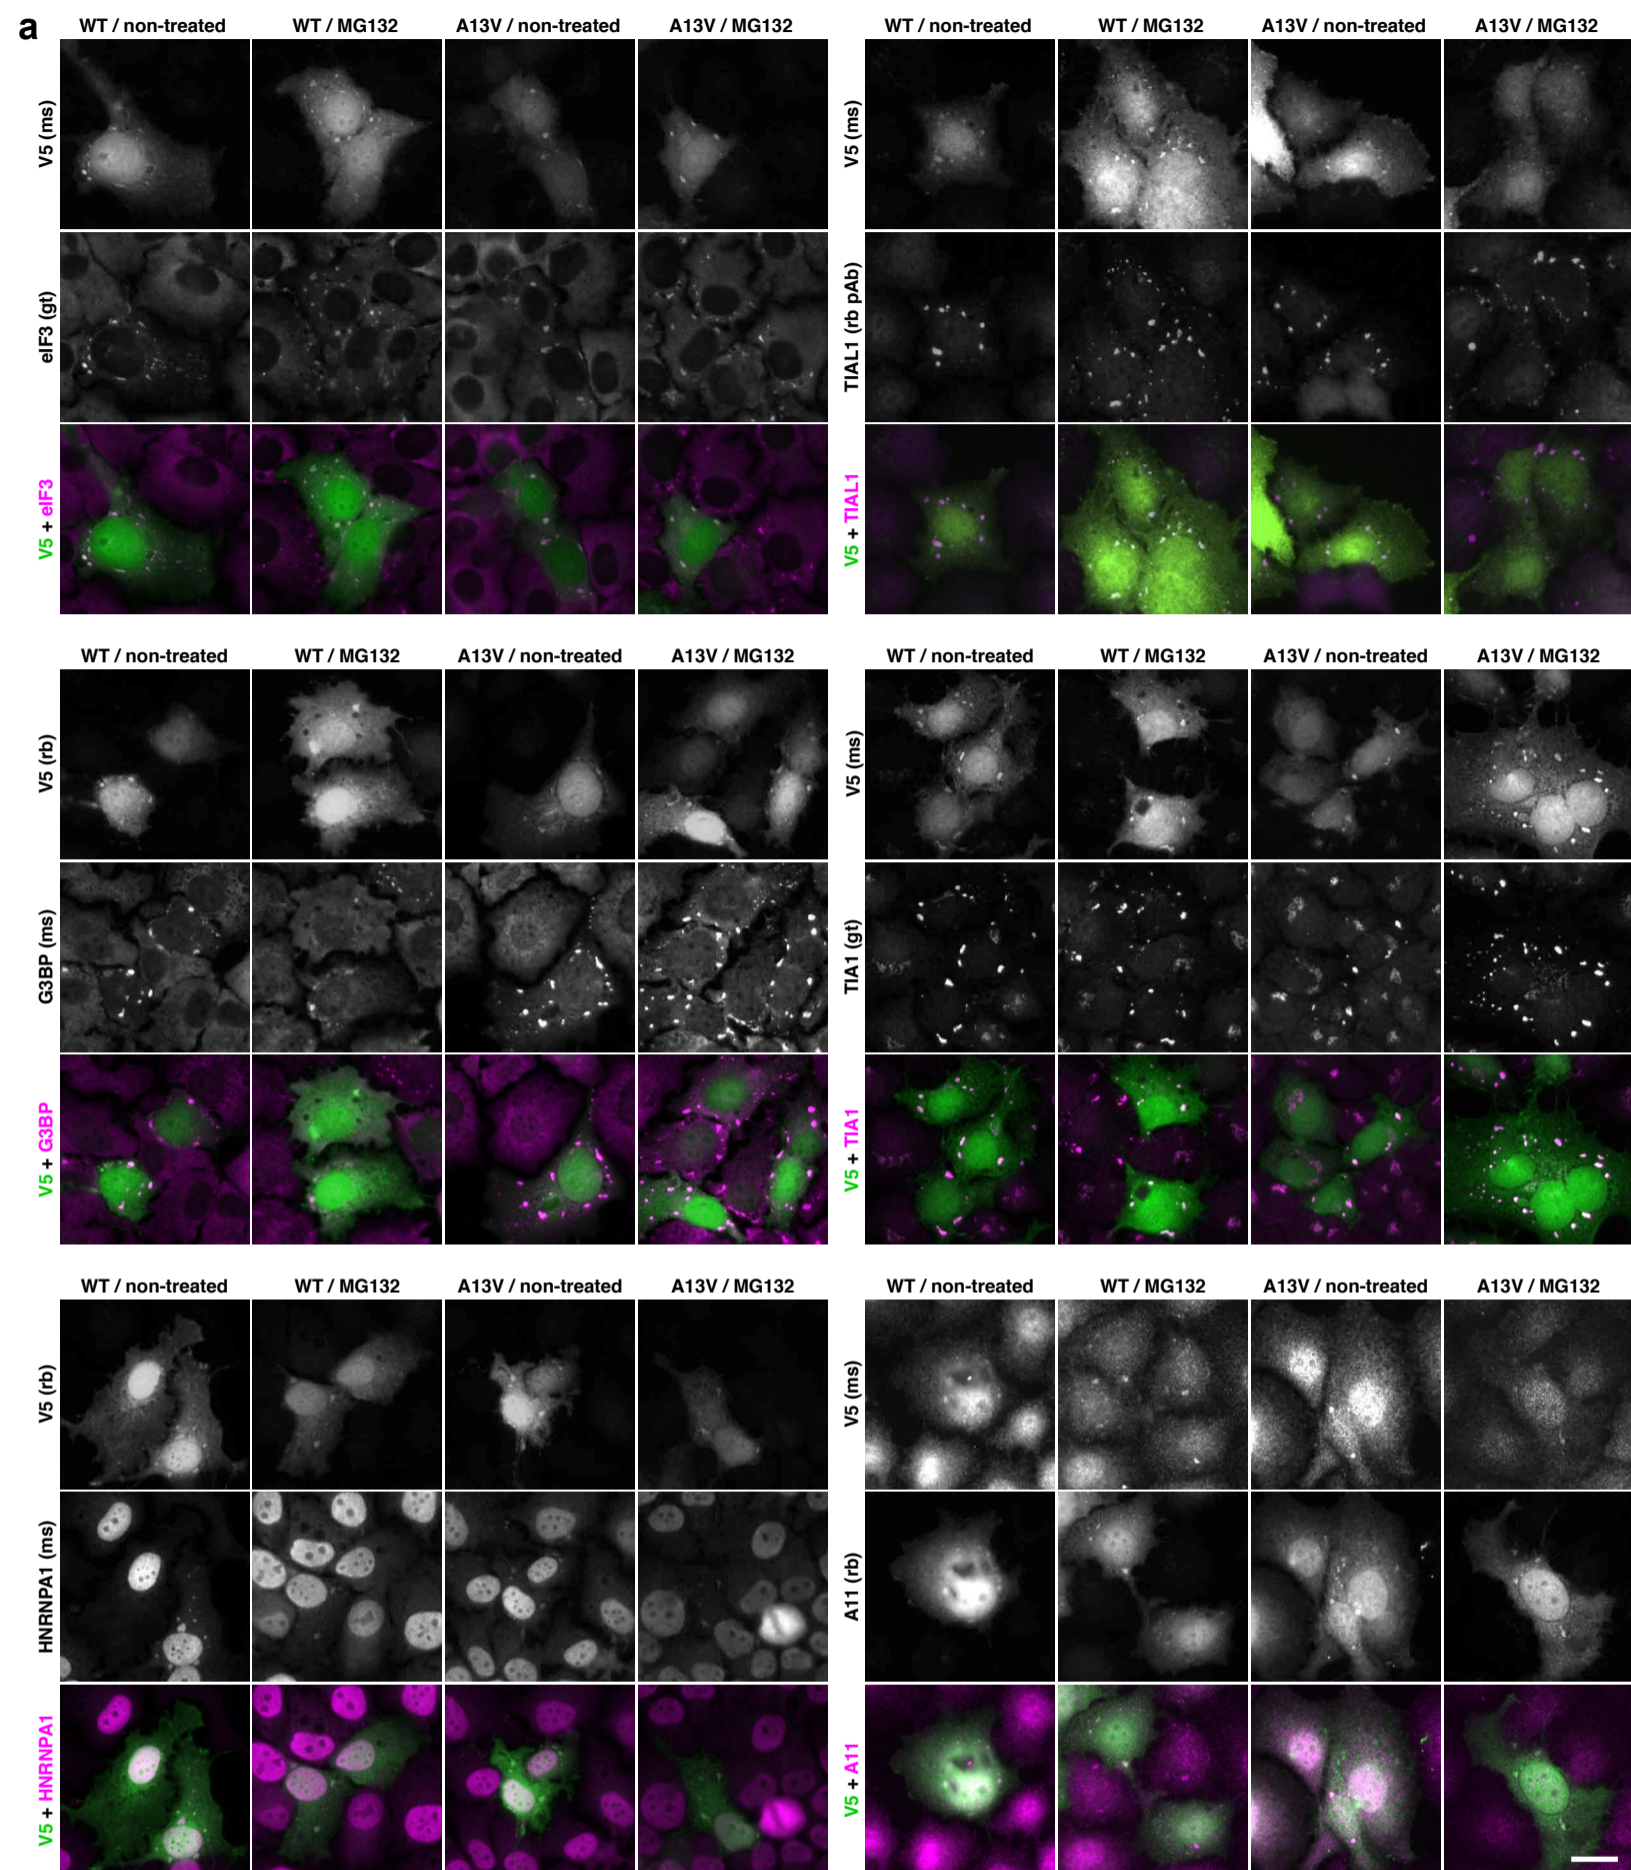

**(a)** Localization of SMPX-V5 to stress granules in HeLa cells. Wild-type (WT) and p.A13V SMPX-V5 were expressed in HeLa cells for 3 d. Cells were left non-treated or treated with 20  $\mu$ M MG132 for 2 h prior to fixing. SMPX-containing SGs stained positive for eIF3, G3BP, TIA1, TIAL1, HNRNPA1, and the amyloid oligomer antibody A11. Scale bar = 20  $\mu$ m.

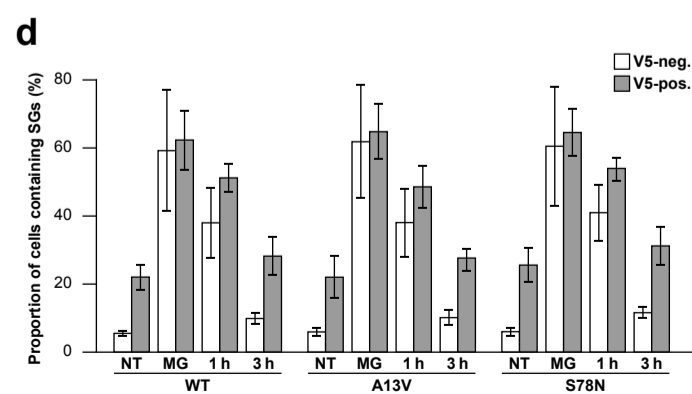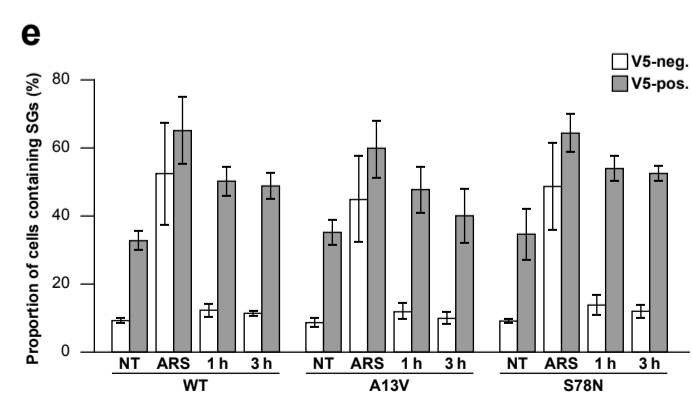

**(d-e)** The proportion of V5-negative and V5-positive cells containing  $\geq 1$  SGs in MG132 (d) and arsenite stress (e) experiments presented in Fig. 6b-c and Supplementary tables 2-3. The graphs show mean  $\pm$  SD of group means from 4 experiments.

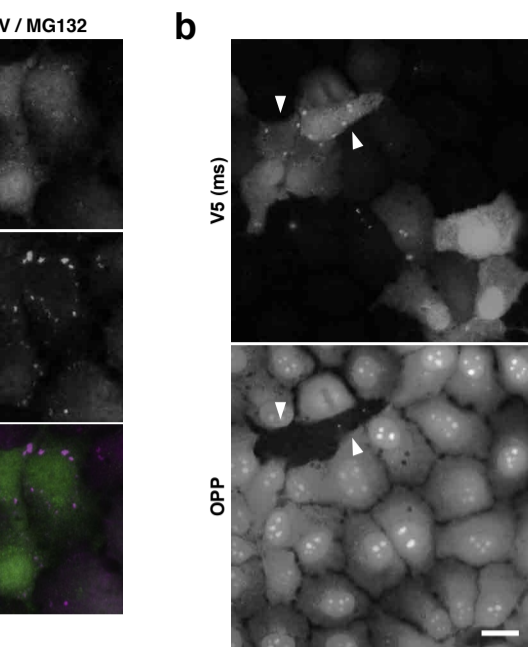

**(b)** Lack of OP-puromycin (OPP) incorporation indicating blocked protein synthesis in HeLa cells containing SMPX-V5 foci (arrowheads). Scale bar = 20  $\mu$ m.

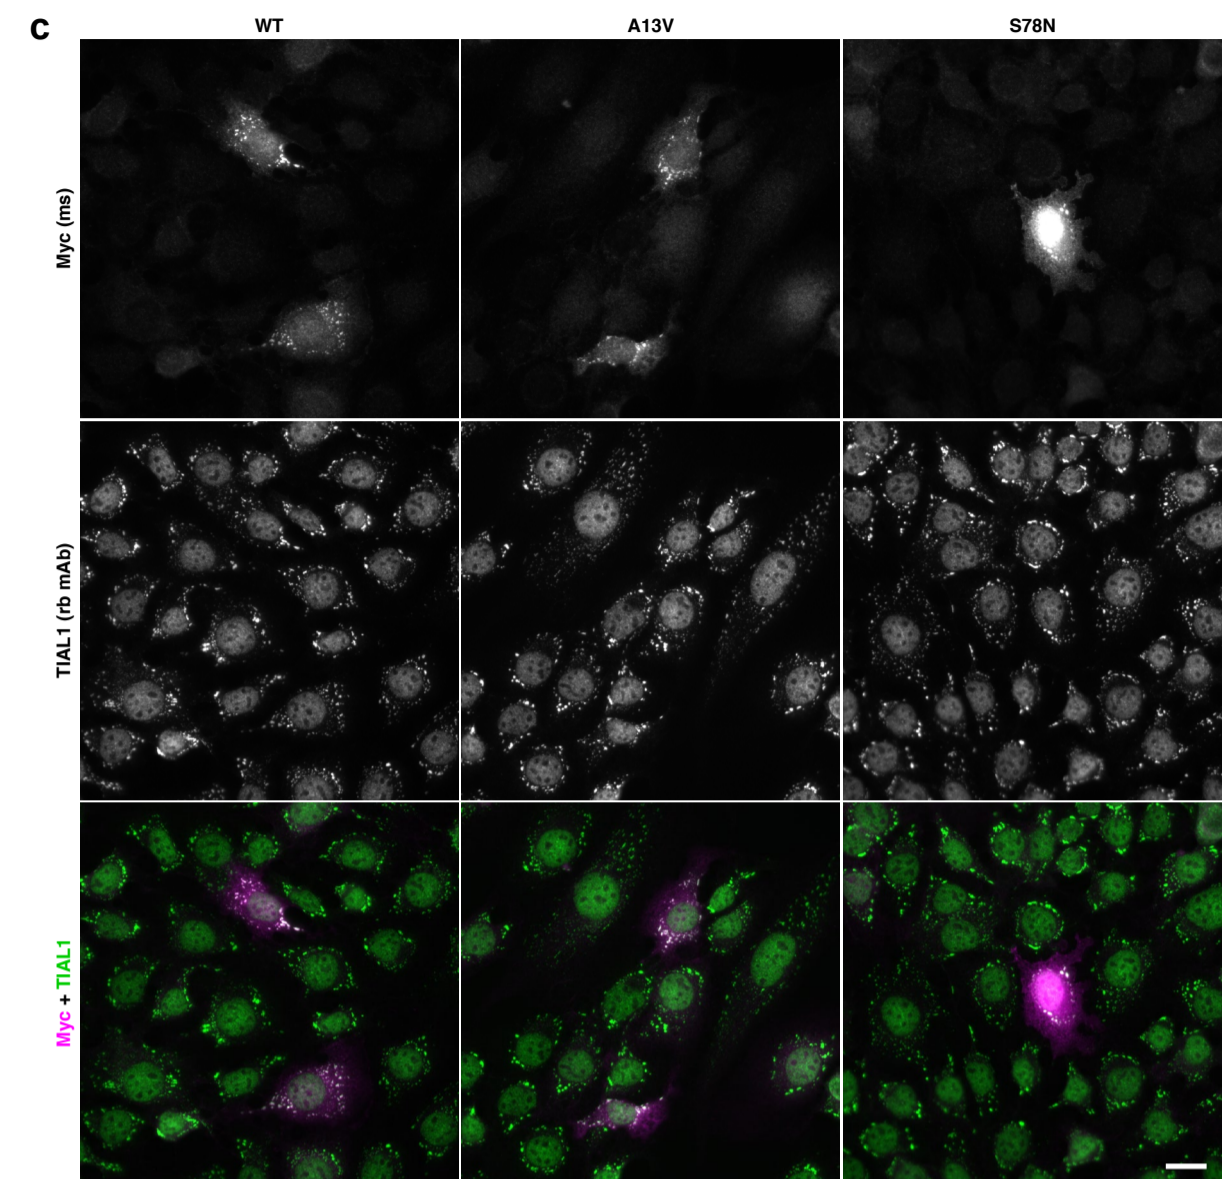

**(c)** Localization of Myc-SMPX cells to stress granules in C2C12 myoblasts. Wild-type or mutant Myc-SMPX was expressed in stably transfected C2C12 myoblasts for 2 d, and SG formation was induced by heat shock (1 h in 45°C) before fixing. Scale bar = 20  $\mu$ m.

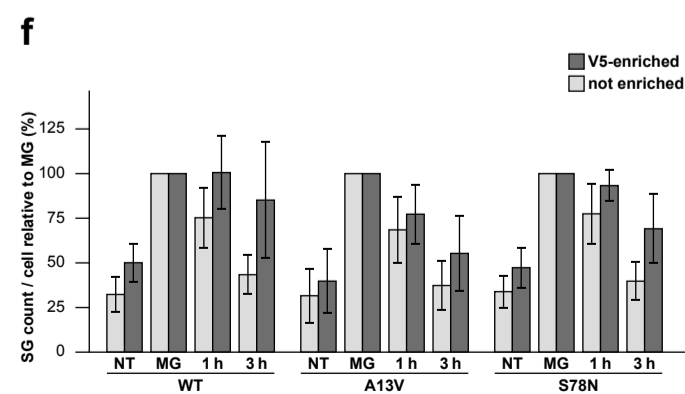

**(f)** Recovery of SMPX-V5-enriched and non-enriched SGs after MG132 stress. Data from Fig. 6d presented normalized to MG within each experiment. The graphs show mean  $\pm$  SD of group means from 4 experiments.

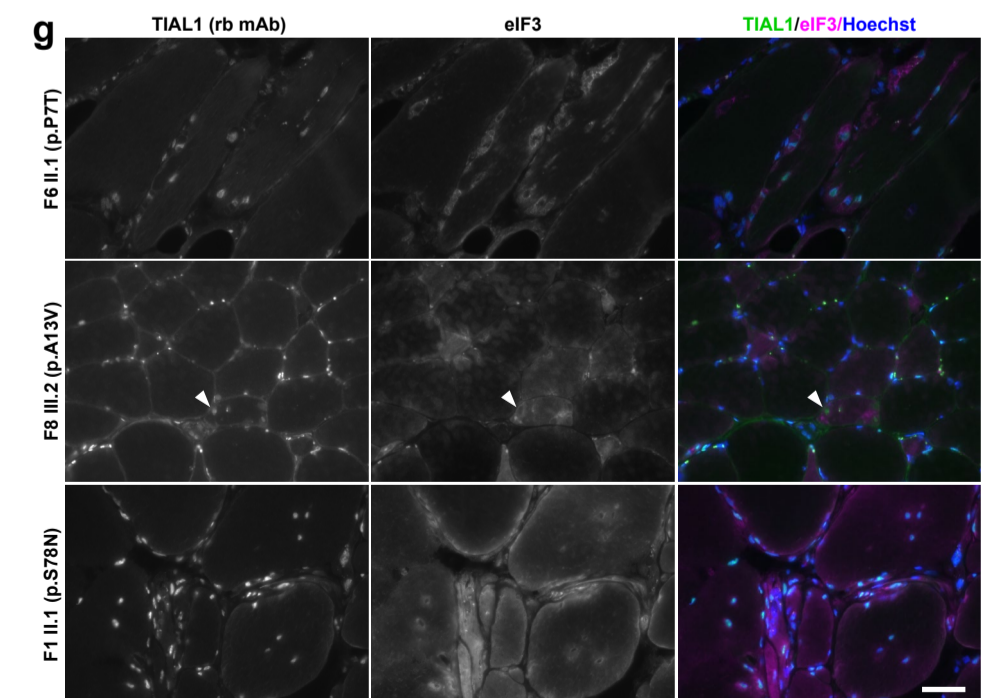

**(g)** IF analysis of SG components in patient muscle biopsies. In F6 II.1 and F8 III.2, accumulation of eIF3 was observed subsarcolemmally and surrounding the sarcoplasmic inclusions, a subset of which stained also positive for TIAL1 in F8 III.2 (arrowhead). In F1 II.1, an increased level of eIF3, but not TIAL1, was seen in the sarcoplasm of atrophic fibers. Scale bar = 50  $\mu$ m.

Supplementary Table 1: Immunohistochemical findings in SMPX patients

| <b>Antibody</b>       | <b>protein inclusions</b> | <b>MFM</b> |
|-----------------------|---------------------------|------------|
| SMPX                  | +                         | -          |
| p62                   | +                         | -          |
| Ubiquitin             | +                         | -          |
| TDP-43                | -                         | -          |
| SMI-31                | +                         | -          |
| Myotilin              | -                         | +          |
| $\alpha$ B-crystallin | -                         | +          |

**Supplementary Table 2: SG dynamics in MG132-stressed cells**

| SG dynamics (Fig. 7, Suppl. Fig. 2) |               |                | exp 1          | exp 2      | exp 3 | exp 4 | sum   | mean  | SD    |       |  |
|-------------------------------------|---------------|----------------|----------------|------------|-------|-------|-------|-------|-------|-------|--|
| WT                                  | NT            | V5-neg. cells  | cell count     | 5460       | 7189  | 7739  | 15415 | 35803 |       |       |  |
|                                     |               |                | SGs/cell       | 0,060      | 0,077 | 0,094 | 0,105 |       | 0,084 | 0,020 |  |
|                                     |               |                | cells with SGs | 4,3%       | 5,4%  | 5,8%  | 6,6%  |       | 5,5%  | 1,0%  |  |
|                                     |               | V5-pos. cells  | cell count     | 866        | 922   | 986   | 1996  | 4770  |       |       |  |
|                                     |               |                | SGs/cell       | 0,387      | 0,656 | 0,624 | 0,573 |       | 0,560 | 0,120 |  |
|                                     |               |                | cells with SGs | 16,3%      | 24,1% | 24,2% | 23,6% |       | 22,1% | 3,9%  |  |
|                                     |               | MG             | V5-neg. cells  | cell count | 6723  | 6336  | 13117 | 13023 | 39199 |       |  |
|                                     |               |                | SGs/cell       | 1,683      | 1,884 | 0,752 | 0,768 |       | 1,272 | 0,596 |  |
|                                     |               |                | cells with SGs | 74,0%      | 75,6% | 43,5% | 43,9% |       | 59,2% | 18,0% |  |
|                                     |               | V5-pos. cells  | cell count     | 1119       | 778   | 1624  | 1786  | 5307  |       |       |  |
|                                     |               |                | SGs/cell       | 1,666      | 1,901 | 1,325 | 1,348 |       | 1,560 | 0,276 |  |
|                                     |               |                | cells with SGs | 69,3%      | 70,6% | 54,3% | 55,1% |       | 62,3% | 8,8%  |  |
|                                     | R1            | V5-neg. cells  | cell count     | 5721       | 8996  | 12110 | 13673 | 40500 |       |       |  |
|                                     |               | SGs/cell       | 0,870          | 0,595      | 0,396 | 0,625 |       | 0,622 | 0,194 |       |  |
|                                     |               | cells with SGs | 50,5%          | 37,6%      | 25,1% | 38,8% |       | 38,0% | 10,4% |       |  |
|                                     | V5-pos. cells | cell count     | 1167           | 1408       | 1597  | 1987  | 6159  |       |       |       |  |
|                                     |               | SGs/cell       | 1,136          | 1,281      | 1,165 | 1,339 |       | 1,230 | 0,095 |       |  |
|                                     |               | cells with SGs | 53,9%          | 52,3%      | 44,6% | 54,0% |       | 51,2% | 4,4%  |       |  |
|                                     | R3            | V5-neg. cells  | cell count     | 5001       | 10223 | 11856 | 11719 | 38799 |       |       |  |
|                                     |               | SGs/cell       | 0,151          | 0,163      | 0,129 | 0,135 |       | 0,145 | 0,015 |       |  |
|                                     |               | cells with SGs | 11,5%          | 11,1%      | 7,8%  | 9,2%  |       | 9,9%  | 1,7%  |       |  |
|                                     | V5-pos. cells | cell count     | 845            | 1439       | 1681  | 1613  | 5578  |       |       |       |  |
|                                     |               | SGs/cell       | 0,400          | 0,915      | 0,814 | 0,893 |       | 0,755 | 0,241 |       |  |
|                                     |               | cells with SGs | 20,1%          | 32,3%      | 28,1% | 32,3% |       | 28,2% | 5,7%  |       |  |
| A13V                                | NT            | V5-neg. cells  | cell count     | 5659       | 7075  | 10721 | 14137 | 37592 |       |       |  |
|                                     |               |                | SGs/cell       | 0,056      | 0,081 | 0,105 | 0,124 |       | 0,092 | 0,030 |  |
|                                     |               |                | cells with SGs | 4,0%       | 5,6%  | 6,9%  | 7,3%  |       | 5,9%  | 1,5%  |  |
|                                     |               | V5-pos. cells  | cell count     | 1241       | 928   | 1555  | 1937  | 5661  |       |       |  |
|                                     |               |                | SGs/cell       | 0,223      | 0,746 | 0,660 | 0,628 |       | 0,564 | 0,233 |  |
|                                     |               |                | cells with SGs | 12,7%      | 26,7% | 23,7% | 25,0% |       | 22,0% | 6,4%  |  |
|                                     |               | MG             | V5-neg. cells  | cell count | 6589  | 6522  | 14156 | 12578 | 39845 |       |  |
|                                     |               |                | SGs/cell       | 1,793      | 1,973 | 0,836 | 0,886 |       | 1,372 | 0,595 |  |
|                                     |               |                | cells with SGs | 75,8%      | 76,8% | 45,4% | 49,3% |       | 61,8% | 16,8% |  |
|                                     |               | V5-pos. cells  | cell count     | 1125       | 874   | 1794  | 1791  | 5584  |       |       |  |
|                                     |               |                | SGs/cell       | 1,826      | 2,211 | 1,318 | 1,459 |       | 1,703 | 0,400 |  |
|                                     |               |                | cells with SGs | 70,7%      | 73,1% | 56,4% | 59,0% |       | 64,8% | 8,3%  |  |
|                                     | R1            | V5-neg. cells  | cell count     | 5941       | 8592  | 13004 | 12526 | 40063 |       |       |  |
|                                     |               | SGs/cell       | 0,797          | 0,570      | 0,357 | 0,748 |       | 0,618 | 0,200 |       |  |
|                                     |               | cells with SGs | 47,2%          | 37,0%      | 24,2% | 44,0% |       | 38,1% | 10,2% |       |  |
|                                     | V5-pos. cells | cell count     | 1090           | 1317       | 1728  | 1825  | 5960  |       |       |       |  |
|                                     |               | SGs/cell       | 1,154          | 1,160      | 0,962 | 1,369 |       | 1,161 | 0,166 |       |  |
|                                     |               | cells with SGs | 52,5%          | 48,0%      | 39,6% | 54,2% |       | 48,6% | 6,5%  |       |  |
|                                     | R3            | V5-neg. cells  | cell count     | 5320       | 9636  | 11614 | 12047 | 38617 |       |       |  |
|                                     |               | SGs/cell       | 0,155          | 0,167      | 0,128 | 0,127 |       | 0,144 | 0,020 |       |  |
|                                     |               | cells with SGs | 12,3%          | 12,2%      | 7,6%  | 8,5%  |       | 10,2% | 2,4%  |       |  |
|                                     | V5-pos. cells | cell count     | 1096           | 1421       | 1499  | 1815  | 5831  |       |       |       |  |
|                                     |               | SGs/cell       | 0,450          | 0,755      | 0,817 | 0,739 |       | 0,690 | 0,164 |       |  |
|                                     |               | cells with SGs | 22,9%          | 30,5%      | 28,8% | 28,4% |       | 27,7% | 3,3%  |       |  |
| S78N                                | NT            | V5-neg. cells  | cell count     | 4985       | 4109  | 4183  | 13305 | 26582 |       |       |  |
|                                     |               |                | SGs/cell       | 0,058      | 0,099 | 0,105 | 0,110 |       | 0,093 | 0,024 |  |
|                                     |               |                | cells with SGs | 4,1%       | 5,9%  | 7,1%  | 7,0%  |       | 6,0%  | 1,4%  |  |
|                                     |               | V5-pos. cells  | cell count     | 904        | 598   | 564   | 1832  | 3898  |       |       |  |
|                                     |               |                | SGs/cell       | 0,423      | 0,895 | 0,707 | 0,663 |       | 0,672 | 0,194 |  |
|                                     |               |                | cells with SGs | 19,2%      | 31,8% | 26,6% | 24,7% |       | 25,6% | 5,2%  |  |
|                                     |               | MG             | V5-neg. cells  | cell count | 7455  | 8130  | 8912  | 8749  | 33246 |       |  |
|                                     |               |                | SGs/cell       | 1,654      | 1,900 | 0,964 | 0,716 |       | 1,309 | 0,560 |  |
|                                     |               |                | cells with SGs | 73,3%      | 77,5% | 50,0% | 41,3% |       | 60,5% | 17,6% |  |
|                                     |               | V5-pos. cells  | cell count     | 1343       | 1135  | 1110  | 1228  | 4816  |       |       |  |
|                                     |               |                | SGs/cell       | 1,695      | 2,075 | 1,594 | 1,518 |       | 1,720 | 0,247 |  |
|                                     |               |                | cells with SGs | 68,1%      | 73,0% | 58,9% | 58,2% |       | 64,6% | 7,2%  |  |
|                                     | R1            | V5-neg. cells  | cell count     | 7584       | 10373 | 12067 | 12624 | 42648 |       |       |  |
|                                     |               | SGs/cell       | 0,892          | 0,633      | 0,495 | 0,734 |       | 0,689 | 0,167 |       |  |
|                                     |               | cells with SGs | 50,5%          | 39,7%      | 30,3% | 43,4% |       | 41,0% | 8,4%  |       |  |
|                                     | V5-pos. cells | cell count     | 1241           | 1518       | 1684  | 1892  | 6335  |       |       |       |  |
|                                     |               | SGs/cell       | 1,315          | 1,418      | 1,324 | 1,559 |       | 1,404 | 0,113 |       |  |
|                                     |               | cells with SGs | 56,3%          | 54,2%      | 48,8% | 56,7% |       | 54,0% | 3,6%  |       |  |
|                                     | R3            | V5-neg. cells  | cell count     | 6994       | 7254  | 7896  | 12051 | 34195 |       |       |  |
|                                     |               | SGs/cell       | 0,168          | 0,179      | 0,171 | 0,146 |       | 0,166 | 0,014 |       |  |
|                                     |               | cells with SGs | 13,0%          | 13,1%      | 10,8% | 9,5%  |       | 11,6% | 1,8%  |       |  |
|                                     | V5-pos. cells | cell count     | 1176           | 1072       | 1146  | 1772  | 5166  |       |       |       |  |
|                                     |               | SGs/cell       | 0,512          | 1,027      | 0,846 | 0,931 |       | 0,829 | 0,224 |       |  |
|                                     |               | cells with SGs | 24,1%          | 37,9%      | 30,1% | 32,7% |       | 31,2% | 5,7%  |       |  |

**Supplementary Table 3: SG dynamics in arsenite-stressed cells**

| SG dynamics (Fig. 7, Suppl. Fig. 2) |                |                | exp 1      | exp 2 | exp 3 | exp 4 | sum   | mean  | SD    |       |
|-------------------------------------|----------------|----------------|------------|-------|-------|-------|-------|-------|-------|-------|
| WT                                  | NT             | cell count     | 5762       | 9723  | 4704  | 5913  | 26102 |       |       |       |
|                                     |                | V5-neg. cells  | SGs/cell   | 0,111 | 0,132 | 0,149 | 0,160 |       | 0,138 | 0,021 |
|                                     |                | cells with SGs | 8,0%       | 9,4%  | 9,5%  | 10,3% |       | 9,3%  | 0,9%  |       |
|                                     | V5-pos. cells  | cell count     | 707        | 757   | 538   | 561   | 2563  |       |       |       |
|                                     |                | SGs/cell       | 0,622      | 0,871 | 1,097 | 1,021 |       | 0,903 | 0,209 |       |
|                                     |                | cells with SGs | 28,4%      | 32,9% | 34,9% | 34,8% |       | 32,8% | 3,0%  |       |
|                                     | ARS            | V5-neg. cells  | cell count | 14903 | 17468 | 12860 | 10240 | 55471 |       |       |
|                                     |                | SGs/cell       | 1,434      | 1,802 | 0,662 | 0,838 |       | 1,184 | 0,528 |       |
|                                     |                | cells with SGs | 61,7%      | 68,7% | 36,6% | 42,9% |       | 52,5% | 15,1% |       |
|                                     | V5-pos. cells  | cell count     | 1841       | 1593  | 1485  | 739   | 5658  |       |       |       |
|                                     |                | SGs/cell       | 2,083      | 2,204 | 1,719 | 1,330 |       | 1,834 | 0,394 |       |
|                                     |                | cells with SGs | 71,8%      | 74,9% | 60,6% | 53,2% |       | 65,1% | 10,0% |       |
| R1                                  | V5-neg. cells  | cell count     | 8753       | 14609 | 10501 | 13893 | 47756 |       |       |       |
|                                     | SGs/cell       | 0,244          | 0,157      | 0,150 | 0,201 |       | 0,188 | 0,044 |       |       |
|                                     | cells with SGs | 15,2%          | 10,9%      | 10,5% | 12,8% |       | 12,3% | 2,2%  |       |       |
| V5-pos. cells                       | cell count     | 656            | 1047       | 1030  | 1128  | 3861  |       |       |       |       |
|                                     | SGs/cell       | 1,299          | 1,363      | 1,171 | 1,499 |       | 1,333 | 0,137 |       |       |
|                                     | cells with SGs | 55,2%          | 46,6%      | 46,5% | 52,7% |       | 50,2% | 4,4%  |       |       |
| R3                                  | V5-neg. cells  | cell count     | 5404       | 13076 | na    | 8034  | 26514 |       |       |       |
|                                     | SGs/cell       | 0,220          | 0,157      | na    | 0,188 |       | 0,188 | 0,032 |       |       |
|                                     | cells with SGs | 12,3%          | 10,5%      | na    | 11,5% |       | 11,4% | 0,9%  |       |       |
| V5-pos. cells                       | cell count     | 498            | 1040       | na    | 601   | 2139  |       |       |       |       |
|                                     | SGs/cell       | 1,506          | 1,400      | na    | 1,602 |       | 1,503 | 0,101 |       |       |
|                                     | cells with SGs | 52,6%          | 44,8%      | na    | 49,1% |       | 48,8% | 3,9%  |       |       |
| A13V                                | NT             | cell count     | 9730       | 9674  | 9499  | 8364  | 37267 |       |       |       |
|                                     |                | V5-neg. cells  | SGs/cell   | 0,097 | 0,136 | 0,167 | 0,125 |       | 0,131 | 0,029 |
|                                     |                | cells with SGs | 7,2%       | 9,1%  | 10,6% | 7,9%  |       | 8,7%  | 1,5%  |       |
|                                     | V5-pos. cells  | cell count     | 811        | 711   | 879   | 579   | 2980  |       |       |       |
|                                     |                | SGs/cell       | 0,732      | 1,020 | 1,003 | 1,090 |       | 0,961 | 0,157 |       |
|                                     |                | cells with SGs | 29,5%      | 38,4% | 35,8% | 37,1% |       | 35,2% | 4,0%  |       |
|                                     | ARS            | V5-neg. cells  | cell count | 15268 | 13731 | 21500 | 11192 | 61691 |       |       |
|                                     |                | SGs/cell       | 0,808      | 1,615 | 0,592 | 0,746 |       | 0,940 | 0,459 |       |
|                                     |                | cells with SGs | 42,4%      | 63,4% | 34,3% | 39,3% |       | 44,9% | 12,8% |       |
|                                     | V5-pos. cells  | cell count     | 1216       | 1042  | 1562  | 549   | 4369  |       |       |       |
|                                     |                | SGs/cell       | 1,433      | 2,194 | 1,249 | 1,508 |       | 1,596 | 0,413 |       |
|                                     |                | cells with SGs | 57,4%      | 72,5% | 53,0% | 56,8% |       | 59,9% | 8,6%  |       |
| R1                                  | V5-neg. cells  | cell count     | 9689       | 10044 | 13097 | 15698 | 48528 |       |       |       |
|                                     | SGs/cell       | 0,243          | 0,137      | 0,170 | 0,180 |       | 0,182 | 0,044 |       |       |
|                                     | cells with SGs | 15,2%          | 9,2%       | 11,4% | 11,7% |       | 11,9% | 2,5%  |       |       |
| V5-pos. cells                       | cell count     | 599            | 607        | 974   | 836   | 3016  |       |       |       |       |
|                                     | SGs/cell       | 1,419          | 1,082      | 1,142 | 1,240 |       | 1,221 | 0,147 |       |       |
|                                     | cells with SGs | 58,1%          | 42,7%      | 45,5% | 44,9% |       | 47,8% | 7,0%  |       |       |
| R3                                  | V5-neg. cells  | cell count     | 10624      | 8169  | na    | 6669  | 25462 |       |       |       |
|                                     | SGs/cell       | 0,176          | 0,108      | na    | 0,150 |       | 0,145 | 0,034 |       |       |
|                                     | cells with SGs | 11,7%          | 7,9%       | na    | 10,2% |       | 9,9%  | 2,0%  |       |       |
| V5-pos. cells                       | cell count     | 801            | 508        | na    | 401   | 1710  |       |       |       |       |
|                                     | SGs/cell       | 1,449          | 1,122      | na    | 1,202 |       | 1,258 | 0,171 |       |       |
|                                     | cells with SGs | 49,4%          | 36,6%      | na    | 34,2% |       | 40,1% | 8,2%  |       |       |
| S78N                                | NT             | cell count     | 8830       | 6207  | 6935  | 7198  | 29170 |       |       |       |
|                                     |                | V5-neg. cells  | SGs/cell   | 0,109 | 0,151 | 0,153 | 0,133 |       | 0,136 | 0,020 |
|                                     |                | cells with SGs | 8,4%       | 10,0% | 9,6%  | 8,5%  |       | 9,1%  | 0,8%  |       |
|                                     | V5-pos. cells  | cell count     | 1214       | 790   | 832   | 785   | 3621  |       |       |       |
|                                     |                | SGs/cell       | 0,528      | 0,834 | 1,210 | 1,149 |       | 0,930 | 0,315 |       |
|                                     |                | cells with SGs | 24,7%      | 32,5% | 42,2% | 39,2% |       | 34,7% | 7,8%  |       |
|                                     | ARS            | V5-neg. cells  | cell count | 11305 | 15189 | 22526 | 12082 | 61102 |       |       |
|                                     |                | SGs/cell       | 0,964      | 1,731 | 0,662 | 0,834 |       | 1,048 | 0,472 |       |
|                                     |                | cells with SGs | 48,9%      | 66,6% | 36,6% | 42,7% |       | 48,7% | 13,0% |       |
|                                     | V5-pos. cells  | cell count     | 1425       | 1810  | 1556  | 941   | 5732  |       |       |       |
|                                     |                | SGs/cell       | 1,587      | 2,277 | 1,638 | 1,775 |       | 1,819 | 0,316 |       |
|                                     |                | cells with SGs | 62,1%      | 72,9% | 60,9% | 61,4% |       | 64,3% | 5,7%  |       |
| R1                                  | V5-neg. cells  | cell count     | 14283      | 14956 | 12123 | 15193 | 56555 |       |       |       |
|                                     | SGs/cell       | 0,322          | 0,187      | 0,219 | 0,184 |       | 0,228 | 0,065 |       |       |
|                                     | cells with SGs | 18,2%          | 11,5%      | 13,9% | 11,8% |       | 13,8% | 3,1%  |       |       |
| V5-pos. cells                       | cell count     | 1190           | 1673       | 1356  | 1284  | 5503  |       |       |       |       |
|                                     | SGs/cell       | 1,679          | 1,551      | 1,626 | 1,463 |       | 1,580 | 0,094 |       |       |
|                                     | cells with SGs | 59,1%          | 50,4%      | 54,8% | 51,6% |       | 54,0% | 3,9%  |       |       |
| R3                                  | V5-neg. cells  | cell count     | 15787      | 11557 | na    | 10653 | 37997 |       |       |       |
|                                     | SGs/cell       | 0,236          | 0,189      | na    | 0,152 |       | 0,192 | 0,042 |       |       |
|                                     | cells with SGs | 14,3%          | 11,5%      | na    | 10,2% |       | 12,0% | 2,1%  |       |       |
| V5-pos. cells                       | cell count     | 1692           | 1232       | na    | 916   | 3840  |       |       |       |       |
|                                     | SGs/cell       | 1,680          | 1,824      | na    | 1,892 |       | 1,798 | 0,108 |       |       |
|                                     | cells with SGs | 54,8%          | 50,2%      | na    | 52,6% |       | 52,5% | 2,3%  |       |       |

na, omitted due to failed staining

**Supplementary Table 4: Effect of SMPX-V5 enrichment on SG recovery**

| V5 enrichment (Fig. 7, Suppl. Fig. 2) |                 |                 | exp 1    | exp 2   | exp 3   | exp 4   | mean    | SD      |        |
|---------------------------------------|-----------------|-----------------|----------|---------|---------|---------|---------|---------|--------|
| WT                                    | NT              | not V5-enr. SGs | per cell | 0,308   | 0,556   | 0,542   | 0,462   | 0,467   | 0,114  |
|                                       |                 | norm. to MG     |          | 18,8 %  | 30,2 %  | 43,0 %  | 37,3 %  | 32,3 %  | 10,4 % |
|                                       | V5-enr. SGs     | per cell        | 0,122    | 0,155   | 0,143   | 0,158   | 0,145   | 0,016   |        |
|                                       |                 | norm. to MG     |          | 41,1 %  | 40,5 %  | 63,3 %  | 55,4 %  | 50,1 %  | 11,2 % |
|                                       | MG              | not V5-enr. SGs | per cell | 1,641   | 1,841   | 1,259   | 1,241   | 1,495   | 0,295  |
|                                       |                 | norm. to MG     |          | 100,0 % | 100,0 % | 100,0 % | 100,0 % | 100,0 % |        |
|                                       | V5-enr. SGs     | per cell        | 0,298    | 0,383   | 0,226   | 0,286   | 0,298   | 0,065   |        |
|                                       |                 | norm. to MG     |          | 100,0 % | 100,0 % | 100,0 % | 100,0 % | 100,0 % |        |
|                                       | R1              | not V5-enr. SGs | per cell | 1,072   | 1,077   | 1,015   | 1,200   | 1,091   | 0,078  |
|                                       |                 | norm. to MG     |          | 65,3 %  | 58,5 %  | 80,6 %  | 96,7 %  | 75,3 %  | 17,0 % |
|                                       | V5-enr. SGs     | per cell        | 0,237    | 0,347   | 0,291   | 0,296   | 0,293   | 0,045   |        |
|                                       |                 | norm. to MG     |          | 79,5 %  | 90,5 %  | 128,6 % | 103,8 % | 100,6 % | 21,1 % |
| R3                                    | not V5-enr. SGs | per cell        | 0,491    | 0,716   | 0,624   | 0,684   | 0,629   | 0,099   |        |
|                                       | norm. to MG     |                 | 29,9 %   | 38,9 %  | 49,6 %  | 55,1 %  | 43,4 %  | 11,2 %  |        |
| V5-enr. SGs                           | per cell        | 0,133           | 0,283    | 0,268   | 0,296   | 0,245   | 0,076   |         |        |
|                                       | norm. to MG     |                 | 44,5 %   | 73,8 %  | 118,7 % | 103,6 % | 85,2 %  | 32,9 %  |        |
| A13V                                  | NT              | not V5-enr. SGs | per cell | 0,187   | 0,647   | 0,565   | 0,498   | 0,474   | 0,201  |
|                                       |                 | norm. to MG     |          | 10,4 %  | 31,3 %  | 47,0 %  | 37,8 %  | 31,6 %  | 15,6 % |
|                                       | V5-enr. SGs     | per cell        | 0,047    | 0,165   | 0,167   | 0,171   | 0,137   | 0,060   |        |
|                                       |                 | norm. to MG     |          | 14,6 %  | 37,5 %  | 54,4 %  | 52,5 %  | 39,8 %  | 18,4 % |
|                                       | MG              | not V5-enr. SGs | per cell | 1,805   | 2,066   | 1,200   | 1,318   | 1,597   | 0,408  |
|                                       |                 | norm. to MG     |          | 100,0 % | 100,0 % | 100,0 % | 100,0 % | 100,0 % |        |
|                                       | V5-enr. SGs     | per cell        | 0,319    | 0,439   | 0,306   | 0,326   | 0,348   | 0,062   |        |
|                                       |                 | norm. to MG     |          | 100,0 % | 100,0 % | 100,0 % | 100,0 % | 100,0 % |        |
|                                       | R1              | not V5-enr. SGs | per cell | 1,068   | 1,034   | 0,857   | 1,231   | 1,048   | 0,153  |
|                                       |                 | norm. to MG     |          | 59,2 %  | 50,0 %  | 71,4 %  | 93,4 %  | 68,5 %  | 18,8 % |
|                                       | V5-enr. SGs     | per cell        | 0,224    | 0,281   | 0,223   | 0,333   | 0,265   | 0,053   |        |
|                                       |                 | norm. to MG     |          | 70,1 %  | 63,9 %  | 72,8 %  | 102,2 % | 77,3 %  | 17,0 % |
| R3                                    | not V5-enr. SGs | per cell        | 0,396    | 0,610   | 0,631   | 0,597   | 0,558   | 0,109   |        |
|                                       | norm. to MG     |                 | 21,9 %   | 29,5 %  | 52,6 %  | 45,3 %  | 37,3 %  | 14,1 %  |        |
| V5-enr. SGs                           | per cell        | 0,095           | 0,212    | 0,241   | 0,210   | 0,190   | 0,065   |         |        |
|                                       | norm. to MG     |                 | 29,7 %   | 48,2 %  | 78,7 %  | 64,7 %  | 55,3 %  | 21,1 %  |        |
| S78N                                  | NT              | not V5-enr. SGs | per cell | 0,346   | 0,689   | 0,601   | 0,507   | 0,536   | 0,147  |
|                                       |                 | norm. to MG     |          | 20,5 %  | 34,9 %  | 42,1 %  | 38,2 %  | 33,9 %  | 9,4 %  |
|                                       | V5-enr. SGs     | per cell        | 0,107    | 0,264   | 0,163   | 0,216   | 0,188   | 0,068   |        |
|                                       |                 | norm. to MG     |          | 33,1 %  | 56,5 %  | 43,0 %  | 56,7 %  | 47,3 %  | 11,5 % |
|                                       | MG              | not V5-enr. SGs | per cell | 1,692   | 1,974   | 1,429   | 1,329   | 1,606   | 0,289  |
|                                       |                 | norm. to MG     |          | 100,0 % | 100,0 % | 100,0 % | 100,0 % | 100,0 % |        |
|                                       | V5-enr. SGs     | per cell        | 0,325    | 0,468   | 0,379   | 0,380   | 0,388   | 0,059   |        |
|                                       |                 | norm. to MG     |          | 100,0 % | 100,0 % | 100,0 % | 100,0 % | 100,0 % |        |
|                                       | R1              | not V5-enr. SGs | per cell | 1,212   | 1,215   | 1,067   | 1,358   | 1,213   | 0,119  |
|                                       |                 | norm. to MG     |          | 71,6 %  | 61,5 %  | 74,6 %  | 102,2 % | 77,5 %  | 17,4 % |
|                                       | V5-enr. SGs     | per cell        | 0,287    | 0,388   | 0,388   | 0,378   | 0,360   | 0,049   |        |
|                                       |                 | norm. to MG     |          | 88,4 %  | 82,9 %  | 102,2 % | 99,5 %  | 93,3 %  | 9,1 %  |
| R3                                    | not V5-enr. SGs | per cell        | 0,415    | 0,802   | 0,618   | 0,673   | 0,627   | 0,161   |        |
|                                       | norm. to MG     |                 | 24,5 %   | 40,6 %  | 43,2 %  | 50,6 %  | 39,8 %  | 11,0 %  |        |
| V5-enr. SGs                           | per cell        | 0,138           | 0,310    | 0,309   | 0,328   | 0,271   | 0,089   |         |        |
|                                       | norm. to MG     |                 | 42,4 %   | 66,2 %  | 81,4 %  | 86,4 %  | 69,1 %  | 19,7 %  |        |
